# Supplementary material for: Pathway toward cost-effective green hydrogen production by solid oxide electrolyzer
Source: Royal Society of Chemistry journal article supplement (doi:10.1039/d3ee00232b), 2023-01-01
Supplement: d3ee00232b8.xlsx [file d3ee00232b8.xlsx]

## Sheet: Main
	Pathway toward cost-effective green hydrogen production by solid oxide electrolyzer
		General Information			Table of content
		Hua Liu			Sheet	Content
		Department of Energy Conversion and Storage, Technical University of Denmark
					Scenario 1 Heat integration
		Lasse Røngaard Clausen			H2P dataset
		Department of Civil and Mechanical Engineering, Technical University of Denmark			H2P analysis
		Ligang Wang			Scenario 2 Super grid integration
		Institute of Energy Power Innovation, North China Electric Power University			Correlation coefficient
		Ming Chen*			Scenario 3 SOEC development
		Department of Energy Conversion and Storage, Technical University of Denmark			SOEC dataset
					SOEC analysis
		Date: 2022-03-04
					Reference

## Sheet: H2P dataset
Cite key	Type	T_hot, °C	H2P efficiency, %	Fluid1	TIT, °C	Pmax, Mpa	Fluid2	TIT, °C	Pmax, Mpa	Ref
Li2016	Steam Rankine Cycle (RC)	250	17.12	Steam	235					Li, C. & Wang, H. Power cycles for waste heat recovery from medium to high temperature flue gas sources – from a view of thermodynamic optimization. Appl Energ 180, 707–721 (2016).
	RC	300	19.83	Steam	285
	RC	350	22.47	Steam	335
	RC	400	24.84	Steam	385
	RC	500	29.09	Steam	485
	RC	600	34.93	Steam	585
	RC	700	35.22	Steam	600
	Transcritical CO2 (tCO2)	200	16.77	CO2	185	19
	tCO2	250	21.42	CO2	235	23
	tCO2	300	25.63	CO2	285	27.2
	tCO2	350	29.27	CO2	335	35
	tCO2	400	32.76	CO2	385	35
	tCO2	500	35.67	CO2	431	35
	tCO2	600	37.89	CO2	471	35
	tCO2	700	39.82	CO2	509	35
	over expansion tCO2	400	31.42	CO2	385	35
	over expansion tCO2	500	35.87	CO2	485	35
	over expansion tCO2	600	39.16	CO2	585	35
	over expansion tCO2	700	40.65	CO2	600	35
	Organic transcritical cycle (OTC) + tCO2	600	36.26	Benzene	315	6.5	CO2	585	35
	OTC + tCO2	700	37.09	Benzene	315	7	CO2	600	35
	OTC + tCO2	600	36.69	R11	270	8	CO2	585	35
	OTC + tCO2	700	37.11	R12	275	8	CO2	600	35
	OTC + Brayton	500	31.24	Air	480		Benzene	310	6.4
	OTC + Brayton	600	34.31	Air	580		Benzene	350	8.2
	OTC + Brayton	700	37.73	Air	680		Benzene	350	7.2
Moreira2019	Organic Rankine Cycle (ORC)	410	33.66	R11	185.36	3.674				Moreira, L. F. & Arrieta, F. R. P. Thermal and economic assessment of organic Rankine cycles for waste heat recovery in cement plants. Renew Sustain Energy Rev 114, 109315 (2019).
	ORC	410	22.13	R124	115.27	3.181
	ORC	410	32.73	R141b	181.82	2.996
	ORC	410	24	R142b	128.58	3.494
	ORC	410	28.59	R600	137.23	2.974
	ORC	410	21.9	R600a	120.44	2.859
	ORC	410	31.19	R123	166.9	2.799
	ORC	410	25.89	R245fa	139.96	2.813
Dai2009	ORC without internal heat exchanger	145	12.1	Ammonia	135	3.9				Dai, Y., Wang, J. & Gao, L. Parametric optimization and comparative study of organic Rankine cycle (ORC) for low grade waste heat recovery. Energ Convers Manage 50, 576–582 (2009).
	ORC without internal heat exchanger	145	11.69	Butane	85.54	1.14
	ORC without internal heat exchanger	145	11.52	Isobutane	87.15	1.55
	ORC without internal heat exchanger	145	11.98	R11	82.09	0.55
	ORC without internal heat exchanger	145	11.83	R123	83.23	0.53
	ORC without internal heat exchanger	145	11.89	R141B	81.72	0.44
	ORC without internal heat exchanger	145	11.53	R236EA	87.73	1.2
	ORC without internal heat exchanger	145	11.85	R245CA	85.17	0.65
	ORC without internal heat exchanger	145	11.85	R113	83.44	0.29
	ORC without internal heat exchanger	145	12.27	Water	135	0.046
	ORC with internal heat exchanger	145	12.25	Ammonia	135	3.9
	ORC with internal heat exchanger	145	12.2	Butane	85.54	1.14
	ORC with internal heat exchanger	145	12.01	Isobutane	87.15	1.55
	ORC with internal heat exchanger	145	12.17	R123	83.23	0.53
	ORC with internal heat exchanger	145	12	R141B	81.72	0.44
	ORC with internal heat exchanger	145	12.37	R236EA	87.73	1.2
	ORC with internal heat exchanger	145	12.45	R245CA	85.17	0.65
	ORC with internal heat exchanger	145	12.54	R113	83.44	0.29
Yari2011	Gas turbine-modular helium reactor (GT-MHR)	710	40.66	Helium	700	N/A				Yari, M. & Mahmoudi, S. M. S. A thermodynamic study of waste heat recovery from GT-MHR using organic Rankine cycles. Heat Mass Transfer 47, 181–196 (2011).
	GT-MHR	760	42.9	Helium	750	N/A
	GT-MHR	810	44.93	Helium	800	N/A
	GT-MHR	860	46.79	Helium	850	4.88
	GT-MHR	910	48.94	Helium	900	N/A
	GT-MHR/Simple Organic Rankine Cycle	710	45.71	Helium	700	N/A	R123	N/A	N/A
	GT-MHR/Simple Organic Rankine Cycle	760	48.15	Helium	750	N/A	R123	N/A	N/A
	GT-MHR/Simple Organic Rankine Cycle	810	50.33	Helium	800	N/A	R123	N/A	N/A
	GT-MHR/Simple Organic Rankine Cycle	860	52.28	Helium	850	6.78	R123	1.76	N/A
	GT-MHR/Simple Organic Rankine Cycle	910	54.02	Helium	900	N/A	R123	N/A	N/A
	GT-MHR/Organic Rankine Cycle with internal heat exchanger	710	45.95	Helium	700	N/A	R123	N/A	N/A
	GT-MHR/Organic Rankine Cycle with internal heat exchanger	760	48.09	Helium	750	N/A	R123	N/A	N/A
	GT-MHR/Organic Rankine Cycle with internal heat exchanger	810	50.25	Helium	800	N/A	R123	N/A	N/A
	GT-MHR/Organic Rankine Cycle with internal heat exchanger	860	52.2	Helium	850	6.62	R123	1.67	N/A
	GT-MHR/Organic Rankine Cycle with internal heat exchanger	910	53.9	Helium	900	N/A	R123	N/A	N/A
	GT-MHR/Regenerative Organic Rankine Cycle	710	44.37	Helium	700	N/A	R123	N/A	N/A
	GT-MHR/Regenerative Organic Rankine Cycle	760	46.91	Helium	750	N/A	R123	N/A	N/A
	GT-MHR/Regenerative Organic Rankine Cycle	810	49.18	Helium	800	N/A	R123	N/A	N/A
	GT-MHR/Regenerative Organic Rankine Cycle	860	51.21	Helium	850	6.25	R123	1.65	N/A
	GT-MHR/Regenerative Organic Rankine Cycle	910	52.98	Helium	900	N/A	R123	N/A	N/A
Soltani2020	Kalina cycle (KC), KC34	153.45	13	Ammonia water	133.45	4.5				Soltani, M., Nabat, M. H., Razmi, A. R., Dusseault, M. B. & Nathwani, J. A comparative study between ORC and Kalina based waste heat recovery cycles applied to a green compressed air energy storage (CAES) system. Energ Convers Manage 222, 113203 (2020).
	KC, KC34	153.45	14.05	Ammonia water	133.45	4.5
	ORC	153.45	12.66	R717	133.45	4.5
	ORC	153.45	12.08	R1270	133.45	4.5
	ORC	153.45	12.74	R290	133.45	4.5
	ORC	153.45	12.72	R1234yf	133.45	4.5
Milewski2017	ORC	198.6	17.3	Butylobenzene	188.6	0.064				Milewski, J. & Krasucki, J. Comparison of ORC and Kalina cycles for waste heat recovery in the steel industry. Journal of Power Technologies 4, 302–307 (2017).
	ORC	140.9	13.1	n-Hexane	130.9	0.506
	ORC	134.5	12.1	n-Pentane	124.5	0.995
	KC	142.1	9.4	Ammonia water	132.1	5.49
	KC	163.2	11.1	Ammonia water	153.2	6.93
	KC	182.7	12.6	Ammonia water	172.7	8.31
	KC	198.7	13.9	Ammonia water	188.7	9.95
Marchionni2018	Simple Regenerated sCO2	276.63	14.268	CO2	256.63	20				Marchionni, M., Bianchi, G. & Tassou, S. A. Techno-economic assessment of Joule-Brayton cycle architectures for heat to power conversion from high-grade heat sources using CO2 in the supercritical state. Energy 148, 1140–1152 (2018).
	sCO2	308.358	16.7935	CO2	288.358	20
	sCO2	352.574	19.866	CO2	332.574	20
	sCO2	395.441	22.4735	CO2	375.441	20
	sCO2	439.995	24.9174	CO2	419.995	20
	sCO2	497.376	27.7245	CO2	477.376	20
	sCO2	547.33	29.9389	CO2	527.33	20
	sCO2	568.009	30.8465	CO2	548.009	20
Ajimotokan2016	TLC	220	21.97	n-pentane	200	3				Ajimotokan, H. A. Efficiency analysis of trilateral-cycle power systems for waste heat recovery-to-power generation. J Cent South Univ 23, 3160–3170 (2016).
	Recuperated TLC	220	23.91	n-pentane	200	3
	Reheat TLC	220	22.07	n-pentane	200	3
	Regenerative TLC	220	22.9	n-pentane	200	3

## Sheet: H2P analysis
Tech	Tech_type	Temperature	efficiency		Tech_type	Temperature	efficiency	Neutral	Optimistic	Pessimistic
Steam Rankine Cycle (RC)	RC	250	17.12		RC	250	17.12	5.992	8.56	11.128
RC	RC	300	19.83		RC	300	19.83	6.9405	9.915	12.8895
RC	RC	350	22.47		RC	350	22.47	7.8645	11.235	14.6055
RC	RC	400	24.84		RC	400	24.84	8.694	12.42	16.146
RC	RC	500	29.09		RC	500	29.09	10.1815	14.545	18.9085
RC	RC	600	34.93		RC	600	34.93	12.2255	17.465	22.7045
RC	RC	700	35.22		RC	700	35.22	12.327	17.61	22.893
Transcritical CO2 (tCO2)	CO2	200	16.77		Other	500	31.24	10.934	15.62	20.306
tCO2	CO2	250	21.42		Other	600	34.31	12.0085	17.155	22.3015
tCO2	CO2	300	25.63		Other	700	37.73	13.2055	18.865	24.5245
tCO2	CO2	350	29.27		Other	710	40.66	14.231	20.33	26.429
tCO2	CO2	400	32.76		Other	760	42.9	15.015	21.45	27.885
tCO2	CO2	500	35.67		Other	810	44.93	15.7255	22.465	29.2045
tCO2	CO2	600	37.89		Other	860	46.79	16.3765	23.395	30.4135
tCO2	CO2	700	39.82		Other	910	48.94	17.129	24.47	31.811
over expansion tCO2	CO2	400	31.42		Other	710	45.71	15.9985	22.855	29.7115
over expansion tCO2	CO2	500	35.87		Other	760	48.15	16.8525	24.075	31.2975
over expansion tCO2	CO2	600	39.16		Other	810	50.33	17.6155	25.165	32.7145
over expansion tCO2	CO2	700	40.65		Other	860	52.28	18.298	26.14	33.982		η
Organic transcritical cycle (OTC) + tCO2	CO2	600	36.26		Other	910	54.02	18.907	27.01	35.113
OTC + tCO2	CO2	700	37.09		Other	710	45.95	16.0825	22.975	29.8675
OTC + tCO2	CO2	600	36.69		Other	760	48.09	16.8315	24.045	31.2585
OTC + tCO2	CO2	700	37.11		Other	810	50.25	17.5875	25.125	32.6625
OTC + Brayton	Other	500	31.24		Other	860	52.2	18.27	26.1	33.93
OTC + Brayton	Other	600	34.31		Other	910	53.9	18.865	26.95	35.035
OTC + Brayton	Other	700	37.73		Other	710	44.37	15.5295	22.185	28.8405
Organic Rankine Cycle (ORC)	ORC	410	33.66		Other	760	46.91	16.4185	23.455	30.4915
ORC	ORC	410	22.13		Other	810	49.18	17.213	24.59	31.967
ORC	ORC	410	32.73		Other	860	51.21	17.9235	25.605	33.2865
ORC	ORC	410	24		Other	910	52.98	18.543	26.49	34.437
ORC	ORC	410	28.59		Other	220	21.97	7.6895	10.985	14.2805
ORC	ORC	410	21.9		Other	220	23.91	8.3685	11.955	15.5415
ORC	ORC	410	31.19		Other	220	22.07	7.7245	11.035	14.3455
ORC	ORC	410	25.89		Other	220	22.9	8.015	11.45	14.885
ORC without internal heat exchanger	ORC	145	12.1		ORC	410	33.66	11.781	16.83	21.879
ORC without internal heat exchanger	ORC	145	11.69		ORC	410	22.13	7.7455	11.065	14.3845
ORC without internal heat exchanger	ORC	145	11.52		ORC	410	32.73	11.4555	16.365	21.2745
ORC without internal heat exchanger	ORC	145	11.98		ORC	410	24	8.4	12	15.6
ORC without internal heat exchanger	ORC	145	11.83		ORC	410	28.59	10.0065	14.295	18.5835
ORC without internal heat exchanger	ORC	145	11.89		ORC	410	21.9	7.665	10.95	14.235
ORC without internal heat exchanger	ORC	145	11.53		ORC	410	31.19	10.9165	15.595	20.2735
ORC without internal heat exchanger	ORC	145	11.85		ORC	410	25.89	9.0615	12.945	16.8285
ORC without internal heat exchanger	ORC	145	11.85		ORC	145	12.1	4.235	6.05	7.865
ORC without internal heat exchanger	ORC	145	12.27		ORC	145	11.69	4.0915	5.845	7.5985
ORC with internal heat exchanger	ORC	145	12.25		ORC	145	11.52	4.032	5.76	7.488
ORC with internal heat exchanger	ORC	145	12.2		ORC	145	11.98	4.193	5.99	7.787
ORC with internal heat exchanger	ORC	145	12.01		ORC	145	11.83	4.1405	5.915	7.6895
ORC with internal heat exchanger	ORC	145	12.17		ORC	145	11.89	4.1615	5.945	7.7285
ORC with internal heat exchanger	ORC	145	12		ORC	145	11.53	4.0355	5.765	7.4945
ORC with internal heat exchanger	ORC	145	12.37		ORC	145	11.85	4.1475	5.925	7.7025
ORC with internal heat exchanger	ORC	145	12.45		ORC	145	11.85	4.1475	5.925	7.7025
ORC with internal heat exchanger	ORC	145	12.54		ORC	145	12.27	4.2945	6.135	7.9755
Gas turbine-modular helium reactor (GT-MHR)	Other	710	40.66		ORC	145	12.25	4.2875	6.125	7.9625
GT-MHR	Other	760	42.9		ORC	145	12.2	4.27	6.1	7.93
GT-MHR	Other	810	44.93		ORC	145	12.01	4.2035	6.005	7.8065
GT-MHR	Other	860	46.79		ORC	145	12.17	4.2595	6.085	7.9105
GT-MHR	Other	910	48.94		ORC	145	12	4.2	6	7.8
GT-MHR/Simple Organic Rankine Cycle	Other	710	45.71		ORC	145	12.37	4.3295	6.185	8.0405
GT-MHR/Simple Organic Rankine Cycle	Other	760	48.15		ORC	145	12.45	4.3575	6.225	8.0925
GT-MHR/Simple Organic Rankine Cycle	Other	810	50.33		ORC	145	12.54	4.389	6.27	8.151
GT-MHR/Simple Organic Rankine Cycle	Other	860	52.28		ORC	153.45	12.66	4.431	6.33	8.229
GT-MHR/Simple Organic Rankine Cycle	Other	910	54.02		ORC	153.45	12.08	4.228	6.04	7.852
GT-MHR/Organic Rankine Cycle with internal heat exchanger	Other	710	45.95		ORC	153.45	12.74	4.459	6.37	8.281
GT-MHR/Organic Rankine Cycle with internal heat exchanger	Other	760	48.09		ORC	153.45	12.72	4.452	6.36	8.268
GT-MHR/Organic Rankine Cycle with internal heat exchanger	Other	810	50.25		ORC	198.6	17.3	6.055	8.65	11.245
GT-MHR/Organic Rankine Cycle with internal heat exchanger	Other	860	52.2		ORC	140.9	13.1	4.585	6.55	8.515
GT-MHR/Organic Rankine Cycle with internal heat exchanger	Other	910	53.9		ORC	134.5	12.1	4.235	6.05	7.865
GT-MHR/Regenerative Organic Rankine Cycle	Other	710	44.37		KC	153.45	13	4.55	6.5	8.45
GT-MHR/Regenerative Organic Rankine Cycle	Other	760	46.91		KC	153.45	14.05	4.9175	7.025	9.1325
GT-MHR/Regenerative Organic Rankine Cycle	Other	810	49.18		KC	142.1	9.4	3.29	4.7	6.11
GT-MHR/Regenerative Organic Rankine Cycle	Other	860	51.21		KC	163.2	11.1	3.885	5.55	7.215
GT-MHR/Regenerative Organic Rankine Cycle	Other	910	52.98		KC	182.7	12.6	4.41	6.3	8.19
Kalina cycle (KC), KC34	KC	153.45	13		KC	198.7	13.9	4.865	6.95	9.035
KC, KC34	KC	153.45	14.05		CO2	200	16.77	5.8695	8.385	10.9005
ORC	ORC	153.45	12.66		CO2	250	21.42	7.497	10.71	13.923
ORC	ORC	153.45	12.08		CO2	300	25.63	8.9705	12.815	16.6595
ORC	ORC	153.45	12.74		CO2	350	29.27	10.2445	14.635	19.0255
ORC	ORC	153.45	12.72		CO2	400	32.76	11.466	16.38	21.294
ORC	ORC	198.6	17.3		CO2	500	35.67	12.4845	17.835	23.1855
ORC	ORC	140.9	13.1		CO2	600	37.89	13.2615	18.945	24.6285
ORC	ORC	134.5	12.1		CO2	700	39.82	13.937	19.91	25.883
KC	KC	142.1	9.4		CO2	400	31.42	10.997	15.71	20.423
KC	KC	163.2	11.1		CO2	500	35.87	12.5545	17.935	23.3155
KC	KC	182.7	12.6		CO2	600	39.16	13.706	19.58	25.454
KC	KC	198.7	13.9		CO2	700	40.65	14.2275	20.325	26.4225
Simple Regenerated sCO2	CO2	276.63	14.268		CO2	600	36.26	12.691	18.13	23.569
sCO2	CO2	308.358	16.7935		CO2	700	37.09	12.9815	18.545	24.1085
sCO2	CO2	352.574	19.866		CO2	600	36.69	12.8415	18.345	23.8485
sCO2	CO2	395.441	22.4735		CO2	700	37.11	12.9885	18.555	24.1215
sCO2	CO2	439.995	24.9174		CO2	276.63	14.268	4.9938	7.13399	9.27419
sCO2	CO2	497.376	27.7245		CO2	308.358	16.7935	5.87774	8.39677	10.9158
sCO2	CO2	547.33	29.9389		CO2	352.574	19.866	6.9531	9.933	12.9129
sCO2	CO2	568.009	30.8465		CO2	395.441	22.4735	7.86574	11.2368	14.6078
TLC	Other	220	21.97		CO2	439.995	24.9174	8.72108	12.4587	16.1963
Recuperated TLC	Other	220	23.91		CO2	497.376	27.7245	9.70359	13.8623	18.0209
Reheat TLC	Other	220	22.07		CO2	547.33	29.9389	10.4786	14.9695	19.4603
Regenerative TLC	Other	220	22.9		CO2	568.009	30.8465	10.7963	15.4233	20.0502

## Sheet: Heat source_EU2
	I&S	NFM	C&P	NMM	M&Q	F&T	T&L	PPP	TE	M	W&WP	C	NS	Total			Bianchi, G. et al. Estimating the waste heat recovery in the European Union Industry. Energy Ecol Environ 4, 211–221 (2019).
AU	7.3	0.8	2.7	1.9	0.6	2.2	0.3	6.1	0.5	2.5	2.4	2.1	0.8	30.3	30.2
BE	6.8	0.8	12.3	3.4	0.1	5.4	0.7	2.5	1	0.8	0.7	0.7	2	37.4	37.2
BG	0.3	0.4	2.6	1.4	0.3	1	0.3	0.7	0.1	0.5	0.2	0.3	0.6	8.6	8.7
CR	0.1	0.1	0.4	0.9	0.1	0.9	0.1	0.2	0	0.3	0.1	0.5	0.2	3.8	3.9
CY	0	0	0	0.5	0	0.1	0	0	0	0	0	0	0	0.7	0.6
CZ	5.9	0.3	3.1	2.7	0.3	2.3	0.5	2.1	1.6	2.8	0.8	0.7	2.3	25.4	25.4
DK	0.2	0	0.7	1.2	0.2	2.3	0.1	0.3	0.1	0.9	0.2	0.7	0.4	7.3	7.3
EE	0	0	0.1	0.4	0.1	0.3	0.1	0.2	0	0.2	0.4	0.2	0.1	2	2.1
FI	3.4	0.4	3.4	0.7	0.7	1.6	0.2	20.9	0.2	1.3	2	1.8	0.8	37.5	37.4
FR	17.5	2.5	12.5	9.2	0.8	17.8	1.1	8.8	3.6	6.3	2.7	4.5	2.9	90.2	90.2
DE	39.3	6	41.6	16.1	1.3	20.2	1.9	21.7	11.7	23.2	6.4	0	9.3	198.8	198.7
GR	0.4	3	0.5	2.1	0.4	2.2	0.1	0.4	0.1	0.2	0.1	0.7	0.9	11	11.1
HU	1.4	0.6	3.7	1.1	0.1	2.3	0.2	0.7	0.8	1.6	0.2	0.9	0.9	14.4	14.5
IE	0	2.9	0.7	1	0.5	1.8	0.1	0.1	0.1	1	0.5	0	0.7	9.2	9.4
IT	14.2	3	11.7	11.8	0.5	11.2	4.6	8.8	1.5	13.5	1.4	1.4	5.2	88.9	88.8
LV	0	0	0.1	0.4	0	0.4	0	0	0	0.1	1.5	0.2	0	2.7	2.7
LT	0	0	1.2	0.5	0	0.8	0.1	0.1	0	0.1	0.3	0.2	0.2	3.4	3.5
LU	0.7	0	0.2	0.3	0	0.1	0.1	0	0	0	0.1	0.1	0.1	1.8	1.7
MT	0	0	0	0	0	0	0	0	0	0	0	0	0.1	0.2	0.1
NL	7.1	0.4	22	1.4	0.4	8	0.4	2.3	0.4	2	0.2	2.7	1.3	48.7	48.6
PL	7.6	1.6	7.2	7	1.4	7.2	0.5	5.5	1.6	2.9	2.9	0.7	2.5	48.6	48.6
PT	0.4	0.1	1.1	3.1	0.4	1.8	1.2	4.6	0.2	0.7	0.4	0.6	0.2	14.7	14.8
RO	4.7	0	4.5	2.1	0.2	2.3	0.7	0.4	0.8	1.6	1	1.6	0.5	20.5	20.4
SK	6.8	0.3	0.8	1.2	0	0.5	0.2	1.6	0.8	0.8	0.1	0.1	0.5	13.7	13.7
SI	0.4	0.3	0.5	0.5	0.1	0.3	0.1	0.6	0.1	0.5	0.2	0.1	0.3	3.9	4
ES	7.6	1.4	9.4	8.6	2	9.4	1.3	6.8	1.9	3.4	1.6	5.3	4.2	62.9	62.9
SE	4.5	0.5	1.9	0.7	0.7	1.5	0.1	13.4	0.8	1.5	1.8	0.4	9.7	37.3	37.5
GB	11.8	1.2	9.2	6.7	0	10.6	2.9	6	4	7.1	0	2.6	31.4	93.5	93.5
EU28	148.5	26.5	154	86.9	11.4	114.4	17.9	114.9	32.1	75.8	28.1	28.9	78.1	917.6	917.5
	148.4	26.6	154.1	86.9	11.2	114.5	17.9	114.8	31.9	75.8	28.2	29.1	78.1	917.4
LT	65.5	36.9	91.3	69.1	72.5	74.7	58	56	56.1	2.3	59.3	6.6	29.6
MT	13.4	32.6	2	4.7	4.2	4.7	5.3	8.2	17.3	22.2	40.7	6.9	32
HT	21.1	30.5	6.7	26.2	23.3	20.6	36.7	35.7	26.6	75.5	0	86.5	38.4

## Sheet: EU
Country	H2 demand, kg	Waste heat potential, MWh			Capacity factor CF, %
		LTWH	MTWH	HTWH	Onshore	Offshore_shallow	Offshore_deep
AU	100	3	2	1	20	30	40
BE	100	3.1	2.1	1.1	20	30	40
BG	100	3.2	2.2	1.2	20	30	40
CR	100	3.3	2.3	1.3	20	30	40
CY	100	3.4	2.4	1.4	20	30	40
CZ	100	3.5	2.5	1.5	20	30	40
DK	100	3.6	2.6	1.6	20	30	40
EE	100	3.7	2.7	1.7	20	30	40
FI	100	3.8	2.8	1.8	20	30	40
FR	100	3.9	2.9	1.9	20	30	40
DE	100	4	3	2	20	30	40
GR	100	4.1	3.1	2.1	20	30	40
HU	100	4.2	3.2	2.2	20	30	40
IE	100	4.3	3.3	2.3	20	30	40
IT	100	4.4	3.4	2.4	20	30	40
LV	100	4.5	3.5	2.5	20	30	40
LT	100	4.6	3.6	2.6	20	30	40
LU	100	4.7	3.7	2.7	20	30	40
MT	100	4.8	3.8	2.8	20	30	40
NL	100	4.9	3.9	2.9	20	30	40
PL	100	5	4	3	20	30	40
PT	100	5.1	4.1	3.1	20	30	40
RO	100	5.2	4.2	3.2	20	30	40
SK	100	5.3	4.3	3.3	20	30	40
SI	100	5.4	4.4	3.4	20	30	40
ES	100	5.5	4.5	3.5	20	30	40
SE	100	5.6	4.6	3.6	20	30	40
GB	100	5.7	4.7	3.7	20	30	40

## Sheet: Correlation coefficient
	ON1	ON2	ON3	ON4	OFF1	OFF2	OFF3	OFF4	Best pair
ON1		0.04065	0.155613	0.0683305	0.0575054	0.13966	0.573732	0.180822	ON2
ON2	0.04065		0.132841	0.289929	0.317574	0.128159	0.0707548	0.125019	ON1
ON3	0.155613	0.132841		0.342388	0.18076	0.504022	0.179227	0.0509443	OFF4
ON4	0.0683305	0.289929	0.342388		0.522306	0.136904	0.112922	0.0584979	OFF4
OFF1	0.0575054	0.317574	0.18076	0.522306		0.145468	0.0973523	0.135089	ON1
OFF2	0.13966	0.128159	0.504022	0.136904	0.145468		0.133797	0.152337	ON2
OFF3	0.573732	0.0707548	0.179227	0.112922	0.0973523	0.133797		0.117778	ON2
OFF4	0.180822	0.125019	0.0509443	0.0584979	0.135089	0.152337	0.117778		ON3
Best pair	ON2	ON1	OFF4	OFF4	ON1	ON2	ON2	ON3
Note	The best pair is the lowest pearson coefficient for each case, mark as red.

## Sheet: SOEC dataset
No.	cite key	Year	Ref	Test time, kh	Cell/Stack	Ncps	Type	Support	d_sup, um	Cathode	d_cat, um	Electrolyte	d_ele, um	Barrier layer	d_bar, um	Anode	d_ano, um	Interconnect	Seal	Shape	Area, cm2	Temperature, C	Current density, A/cm2	Cathode flow	v_cat, NL/h	Conversion ratio	Anode flow	v_ano, NL/h	Initial voltage, V	dVdt, mV/kh	ts, kh	V1, V	dVdt, mV/kh	Life time, y	Overlife specific H2 production rate, kg/cm2
	XXX2022a	2022																					-0.5						1	1	0	1	1	57.0776	83.9506
1	Schefold2013a	2013	Schefold, J. & Brisse, A. Steam Electrolysis in Reversibly Operated SOFC: Long-Term Cell Testing Beyond 1000 h. Ecs Transactions 53, 53–61 (2013).	2.5	Cell	1	Electrolyte support	-	-	Ni	-	ScCeSc	140	CGO	-	LSCF	-	-	-	circular	45	834	-0.5	91% H2O + 9% H2	93	0.4	Air	90	1	875	0.04	1.035	6	8.8516	13.0191
2	Hubert2018a	2018	Hubert, M. et al. Impact of Nickel agglomeration on Solid Oxide Cell operated in fuel cell and electrolysis modes. J Power Sources 397, 240–251 (2018).	2	Cell	1	Fuel electrode support	-	-	Ni/YSZ	260	8YSZ	5	CGO	2-3	LSCF/CGO LSCF	15 18	LSC 20um	Glass	circular	9	850	-0.5	50% H2O + 50% H2	6.4	0.6	Air	22.4	1.06	45.4	0.22	1.06999	8.08404	6.09734	8.96806
3	Fang2015a	2015	Fang, Q., Blum, L. & Menzler, N. H. Performance and Degradation of Solid Oxide Electrolysis Cells in Stack. J Electrochem Soc 162, F907–F912 (2015).	2.5	Stack	2	Fuel electrode support	Ni/YSZ	1000	Ni/YSZ	7	8YSZ	10	CGO	0.5	LSCF	40	MCF-coated Crofer 22 APU	Ceramic glass	planar	80	800	-0.5	50% H2O + 50% H2	133.2	0.5	Air	480	1.042	0	0	1.042	9.13	5.72652	8.42265
4	Lang2020a	2020	Lang, M., Raab, S., Lemcke, M. S., Bohn, C. & Pysik, M. Long-Term Behavior of a Solid Oxide Electrolyzer (SOEC) Stack. Fuel Cells 20, 690–700 (2020).	3.5	Stack	30	Electrolyte support	-	-	Ni/(Gd,Ce)O2 (Ni-CGO)	-	3YSZ	80	CGO	-	LSCF	-	Stainless steel (Crofer 22 APU)	Glass	planar	128	800	-0.5	80% H2O + 9% H2 + 11% N2	50	0.7	Air	60	1.29581	5.38832	1.50332	1.30391	5.31741	4.38135	6.44416
5	Fang2015b	2015	Fang, Q., Blum, L. & Menzler, N. H. Performance and Degradation of Solid Oxide Electrolysis Cells in Stack. J Electrochem Soc 162, F907–F912 (2016).	2	Stack	2	Fuel electrode support	Ni/YSZ	1000	Ni/YSZ	7	8YSZ	10	CGO	0.5	LSCF	40	MCF-coated Crofer 22 APU	Ceramic glass	planar	80	700	-0.5	50% H2O + 50% H2	133.2	0.5	Air	480	1.25546	0	0	1.25546	31.1422	0.8964	1.31844
6	Schefold2020a	2020	Schefold, J., Poepke, H. & Brisse, A. Solid Oxide Electrolyser Cell Testing Up to the Above 30,000 h Time Range. Ecs Transactions 97, 553–563 (2020).	20	Cell	1	Electrolyte support	-	-	Ni-CGO	-	10Sc1CeSc	160	Ni-CGO	-	LSCF	-	-	-	circular	45	780	-0.6	91% H2O + 9% H2	88	0.5	Air	90	1.05088	991.1	0.195896	1.24503	7.21187	4.05824	7.16271
7	Schefold2020b	2020	Schefold, J., Poepke, H. & Brisse, A. Solid Oxide Electrolyser Cell Testing Up to the Above 30,000 h Time Range. Ecs Transactions 97, 553–563 (2020).	10	Cell	1	Electrolyte support	-	-	Ni-CGO	-	10Sc1CeSc	160	Ni-CGO	-	LSCF	-	-	-	circular	45	800	-0.6	91% H2O + 9% H2	88	0.5	Air	90	1.31053	0	0	1.31053	3.95447	5.46961	9.65373
8	Schefold2022a	2022	Schefold, J., Léon, A. & Walter, C. 30,000 Hours Steam Electrolysis with a 3YSZ Electrolyte Supported Cell at Elevated Current Density. in 15th European SOFC & SOE Forum (2022).	6	Cell	1	Electrolyte support	-	-	Ni-CGO	-	3YSZ	40	CGO (barrier and adhesion layer)	-	LSCF-CGO	-	-	-	circular	45	850	-0.7	91% H2O + 9% H2	-	0.6	Air	90	1.05498	10.5812	3.08362	1.08761	5.97979	8.22455	16.9355
9	Schefold2013b	2013	Schefold, J. & Brisse, A. Steam Electrolysis in Reversibly Operated SOFC: Long-Term Cell Testing Beyond 1000 h. Ecs Transactions 53, 53–61 (2013).	6	Cell	1	Fuel electrode support	Ni/3YSZ	1000	Ni-YSZ	8	8YSZ	10	CGO	5	LSCF	40	-	-	circular	45	780	-0.75	93.5% H2O + 4.5% H2 + 2% N2	43.6	0.405	Air	90	1.02	11	1.5	1.0365	10	5.46233	12.0511
10	Sun2015a	2015	Sun, X., Chen, M., Liu, Y.-L. & Hendriksen, P. V. Life Time Performance Characterization of Solid Oxide Electrolysis Cells for Hydrogen Production. Ecs Transactions 68, 3359–3368 (2015).	1	Cell	1	Fuel electrode support	-	-	Ni/YSZ	-	YSZ	-	CGO	-	LSCF/CGO	-	-	Gold	planar	16	800	-0.75	90% H2O + 10% H2	13.4	0.42	O2	50	1.06	41.9	0.4	1.07676	18.6	2.64325	5.83159
11	Schefold2022b	2022	Schefold, J., Léon, A. & Walter, C. 30,000 Hours Steam Electrolysis with a 3YSZ Electrolyte Supported Cell at Elevated Current Density. in 15th European SOFC & SOE Forum (2022).	24	Cell	1	Electrolyte support	-	-	Ni-CGO	-	3YSZ	40	CGO (barrier and adhesion layer)	-	LSCF-CGO	-	-	-	circular	45	850	-0.9	91% H2O + 9% H2	-	-	Air	90	1.16012	0	0	1.16012	4.4211	8.77586	23.2338
12	Schefold2017a	2017	Schefold, J., Brisse, A. & Poepke, H. 23,000 h steam electrolysis with an electrolyte supported solid oxide cell. Int J Hydrogen Energ 42, 13415–13426 (2017).	20	Cell	1	Electrolyte support	-	-	Ni-CGO	-	ScCeSc	130	CGO	-	LSCF	-	-	-	circular	45	850	-0.9	91% H2O + 9% H2	43.68	0.51	Air	90	1.18522	0	0	1.18522	7.33761	4.89725	12.9653
13	Hauch2016a	2016	Hauch, A., Brodersen, K., Chen, M. & Mogensen, M. B. Ni/YSZ electrodes structures optimized for increased electrolysis performance and durability. Solid State Ionics 293, 27–36 (2016).	2	Cell	1	Fuel electrode support	Ni/3YSZ	300	Ni/YSZ	12-16	YSZ	10	CGO	6-7	LSC/CGO	30	-	Glass	planar	16	800	-1	90% H2O + 10% H2		0.56	O2	50	1.09	268.7	0.64	1.26197	6.62	4.17768	12.2892
14	Schefold2011a	2011	Schefold, J., Brisse, A. & Tietz, F. Nine Thousand Hours of Operation of a Solid Oxide Cell in Steam Electrolysis Mode. J Electrochem Soc 159, A137–A144 (2011).	1	Cell	1	Fuel electrode support	Ni/3YSZ	1500	Ni-YSZ	8	8YSZ	10	CGO	5	LSCF	40	-	-	circular	45	800	-1	93.5% H2O + 3% H2 + 3.5% N2	200	0.36	Air	90	1.12897	26.8102	1.2069	1.16133	18.6508	2.21067	6.50297
15	Sun2015b	2015	Sun, X., Chen, M., Liu, Y.-L. & Hendriksen, P. V. Life Time Performance Characterization of Solid Oxide Electrolysis Cells for Hydrogen Production. Ecs Transactions 68, 3359–3368 (2015).	1	Cell	1	Fuel electrode support			Ni/YSZ		YSZ		CGO		LSCF/CGO			Gold	planar	16	800	-1	90% H2O + 10% H2	13.4	0.56	O2	50	1.1	64.2	0.4	1.12568	22.7	1.92807	5.67166
16	Tietz2013a	2013	Tietz, F., Sebold, D., Brisse, A. & Schefold, J. Degradation phenomena in a solid oxide electrolysis cell after 9000 h of operation. J Power Sources 223, 129–135 (2013).	6	Cell	1	Fuel electrode support	Ni/8YSZ	1500	NI/8YSZ	8	8YSZ	10	CGO	5	LSCF	35-40	-	-	circular	45	800	-1	80% H2O + 9.2% H2 + 10.8% N2	65.4	-	Air	90	1.06	0	0	1.06	31.6	1.5895	4.67573
17	Sun2019a	2019	Sun, X., Hendriksen, P. V., Mogensen, M. B. & Chen, M. Degradation in Solid Oxide Electrolysis Cells During Long Term Testing. Fuel Cells 19, 740–747 (2019).	4	Cell	1	Fuel electrode support	Ni/3YSZ	300	Ni/8YSZ	10	YSZ	12	CGO	10	LSCF/CGO	-	-	-	planar	16	800	-1	90% H2O + 10% H2	-	0.56	O2	-	1.16309	628.727	0.214559	1.29799	22.8691	1.03288	3.03835
18	Ovtar2019a	2019	Ovtar, S. et al. Boosting the performance and durability of Ni/YSZ cathode for hydrogen production at high current densities via decoration with nano-sized electrocatalysts. Nanoscale 11, 4394–4406 (2019).	3	Cell	1	Fuel electrode support	Ni/3YSZ	300	Ni/8YSZ	10	YSZ	8	CGO	5	LSCF/CGO	25	Ni mesh	Gold	planar	16	800	-1.25	90% H2O + 10% H2	22	0.42	Air	50	1.124	0	0	1.124	64	0.670662	2.46605
19	Tong2019a	2019	Tong, X., Hendriksen, P. V., Hauch, A. & Chen, M. Development of Solid Oxide Electrolysis Cells for Hydrogen Production at High Current Densities. Ecs Transactions 91, 2433–2442 (2019).	1	Cell	1	Fuel electrode support	Ni/YSZ	-	Ni/YSZ	-	YSZ	-	CGO	-	LSCF/CGO	-	Ni mesh	Gold	planar	16	750	-1.25	90% H2O + 10% H2	22	0.42	Air	50	1.34684	32.6087	0.27173	1.3557	26.4773	0.653177	2.40176
20	Virtual2025a	2025	-	-		-		-	-	-	-	-	-	-	-	-	-	-	-		-	800	-1.25	-	-	-	-	-	1	0	0	1	5	11.4155	41.9753

## Sheet: SOEC analysis
Start-up test	cite key	Test time, kh	J, A/cm2	H2 prod*, kg/cm2	LCOH
1	Schefold2013a	2.5	-0.5	13.0191	2.42277
2	Hubert2018a	2	-0.5	8.96806	2.41943
3	Fang2015a	2.5	-0.5	8.42265	2.42813
4	Lang2020a	3.5	-0.5	6.44416	2.46392
6	Schefold2020a	20	-0.6	7.16271	2.38943
8	Schefold2022a	6	-0.7	16.9355	2.23915
9	Schefold2013b	6	-0.75	12.0511	2.25321
10	Sun2015a	1	-0.75	5.83159	2.29529
13	Hauch2016a	2	-1	12.2892	2.14288
15	Sun2015b	1	-1	5.67166	2.20386
16	Tietz2013a	6	-1	4.67573	2.25766
17	Sun2019a	4	-1	3.03835	2.33722
18	Ovtar2019a	3	-1.25	2.46605	2.35048
Halfway test**	cite key	Test time, kh	J, A/cm2	H2 prod*, kg/cm2	LCOH
5	Fang2015b	2	-0.5	1.31844	2.94481
7	Schefold2020b	10	-0.6	9.65373	2.304
11	Schefold2022b	24	-0.9	23.2338	2.06501
12	Schefold2017a	20	-0.9	12.9653	2.08983
14	Schefold2011a	1	-1	6.50297	2.16363
19	Tong2019a	1	-1.25	2.40176	2.31646
Virtual test	cite key	Test time, kh	J, A/cm2	H2 prod*, kg/cm2	LCOH
20	Virtual2025a	-	-1.25	41.9753	1.94525
Note	* Estimate @V_EoL = 1.5V
	** The halfway test was performed after another long-term test. As a result, if the test starts with the same operation, the initial voltage may be lower than the current one, and the LCOH and VEoL may vary slightly.
Parameters
Capacity factor, CF	0.913	8kh/year
Learning rate, LR	0.27

## Sheet: Ref
Citekey	Year	Ref
H2P
Li2016	2016	Li, C. & Wang, H. Power cycles for waste heat recovery from medium to high temperature flue gas sources – from a view of thermodynamic optimization. Appl Energ 180, 707–721 (2016).
Moreira2019	2019	Moreira, L. F. & Arrieta, F. R. P. Thermal and economic assessment of organic Rankine cycles for waste heat recovery in cement plants. Renew Sustain Energy Rev 114, 109315 (2019).
Dai2009	2009	Dai, Y., Wang, J. & Gao, L. Parametric optimization and comparative study of organic Rankine cycle (ORC) for low grade waste heat recovery. Energ Convers Manage 50, 576–582 (2009).
Yari2011	2011	Yari, M. & Mahmoudi, S. M. S. A thermodynamic study of waste heat recovery from GT-MHR using organic Rankine cycles. Heat Mass Transfer 47, 181–196 (2011).
Soltani2020	2020	Soltani, M., Nabat, M. H., Razmi, A. R., Dusseault, M. B. & Nathwani, J. A comparative study between ORC and Kalina based waste heat recovery cycles applied to a green compressed air energy storage (CAES) system. Energ Convers Manage 222, 113203 (2020).
Milewski2017	2017	Milewski, J. & Krasucki, J. Comparison of ORC and Kalina cycles for waste heat recovery in the steel industry. Journal of Power Technologies 4, 302–307 (2017).
Marchionni2018	2018	Marchionni, M., Bianchi, G. & Tassou, S. A. Techno-economic assessment of Joule-Brayton cycle architectures for heat to power conversion from high-grade heat sources using CO2 in the supercritical state. Energy 148, 1140–1152 (2018).
Ajimotokan2016	2016	Ajimotokan, H. A. Efficiency analysis of trilateral-cycle power systems for waste heat recovery-to-power generation. J Cent South Univ 23, 3160–3170 (2016).
Wu2019	2019	Wu, Z., Zhang, Y. & Deng, N. Performance investigation of the heat pump and power generation integration system. Int J Energ Res 43, 8608–8622 (2019).
SOEC degradation
Schefold2013	2013	Schefold, J. & Brisse, A. Steam Electrolysis in Reversibly Operated SOFC: Long-Term Cell Testing Beyond 1000 h. Ecs Transactions 53, 53–61 (2013).
Hubert2018	2018	Hubert, M. et al. Impact of Nickel agglomeration on Solid Oxide Cell operated in fuel cell and electrolysis modes. J Power Sources 397, 240–251 (2018).
Fang2015	2015	Fang, Q., Blum, L. & Menzler, N. H. Performance and Degradation of Solid Oxide Electrolysis Cells in Stack. J Electrochem Soc 162, F907–F912 (2015).
Lang2020	2020	Lang, M., Raab, S., Lemcke, M. S., Bohn, C. & Pysik, M. Long-Term Behavior of a Solid Oxide Electrolyzer (SOEC) Stack. Fuel Cells 20, 690–700 (2020).
Fang2016	2016	Fang, Q., Blum, L. & Menzler, N. H. Performance and Degradation of Solid Oxide Electrolysis Cells in Stack. J Electrochem Soc 162, F907–F912 (2016).
Schefold2020	2020	Schefold, J., Poepke, H. & Brisse, A. Solid Oxide Electrolyser Cell Testing Up to the Above 30,000 h Time Range. Ecs Transactions 97, 553–563 (2020).
Schefold2022	2022	Schefold, J., Léon, A. & Walter, C. 30,000 Hours Steam Electrolysis with a 3YSZ Electrolyte Supported Cell at Elevated Current Density. in 15th European SOFC & SOE Forum (2022).
Sun2015	2015	Sun, X., Chen, M., Liu, Y.-L. & Hendriksen, P. V. Life Time Performance Characterization of Solid Oxide Electrolysis Cells for Hydrogen Production. Ecs Transactions 68, 3359–3368 (2015).
Schefold2017	2017	Schefold, J., Brisse, A. & Poepke, H. 23,000 h steam electrolysis with an electrolyte supported solid oxide cell. Int J Hydrogen Energ 42, 13415–13426 (2017).
Hauch2016	2016	Hauch, A., Brodersen, K., Chen, M. & Mogensen, M. B. Ni/YSZ electrodes structures optimized for increased electrolysis performance and durability. Solid State Ionics 293, 27–36 (2016).
Schefold2011	2011	Schefold, J., Brisse, A. & Tietz, F. Nine Thousand Hours of Operation of a Solid Oxide Cell in Steam Electrolysis Mode. J Electrochem Soc 159, A137–A144 (2011).
Tietz2013	2013	Tietz, F., Sebold, D., Brisse, A. & Schefold, J. Degradation phenomena in a solid oxide electrolysis cell after 9000 h of operation. J Power Sources 223, 129–135 (2013).
Sun2019	2019	Sun, X., Hendriksen, P. V., Mogensen, M. B. & Chen, M. Degradation in Solid Oxide Electrolysis Cells During Long Term Testing. Fuel Cells 19, 740–747 (2019).
Ovtar2019	2019	Ovtar, S. et al. Boosting the performance and durability of Ni/YSZ cathode for hydrogen production at high current densities via decoration with nano-sized electrocatalysts. Nanoscale 11, 4394–4406 (2019).
Tong2019	2019	Tong, X., Hendriksen, P. V., Hauch, A. & Chen, M. Development of Solid Oxide Electrolysis Cells for Hydrogen Production at High Current Densities. Ecs Transactions 91, 2433–2442 (2019).
