# Supplementary figures and images for: Pathway toward cost-effective green hydrogen production by solid oxide electrolyzer
Source: Royal Society of Chemistry journal article supplement (doi:10.1039/d3ee00232b), 2023-01-01

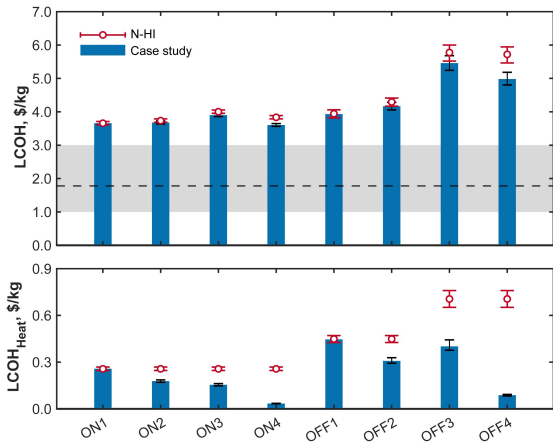

Supplement: d3ee00232b3.pdf [file d3ee00232b3.pdf]

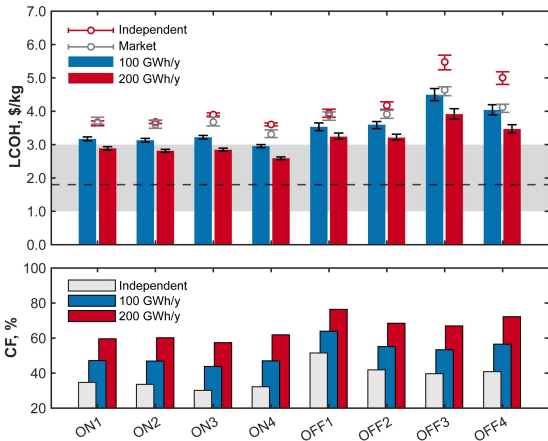

Supplement: d3ee00232b4.pdf [file d3ee00232b4.pdf]
